# Supplementary material for: Benefits and risks of sleep medication in individuals with hypertension and sleep disturbance: Evidence from a large population-based study
Source: Research Square preprint supplement (doi:10.21203/rs.3.rs-6505576/v1), 2025-06-03
Supplement: Supplementary file 1 [file 7dad89ee0ad82cceba140ba6.docx]

**[Supplementary Materials](D:/u%E7%9B%98/%E6%9C%89%E9%81%93/10.0.9.0/resultui/html/index.html" \l "/javascript:;)**

**[Supplementary Tables](D:/u%E7%9B%98/%E6%9C%89%E9%81%93/10.0.9.0/resultui/html/index.html" \l "/javascript:;)**

**Table S1.** Types of sleep medication found in the NHANES database.

**Table S2.** Detail information of sleep medication.

**Table S3.** Characteristics of benzodiazepine users and Z-drug users.

**Table S4.** Estimated variations in blood pressure across specific sleep medications in participants with hypertension and sleep disturbance.

**Table S5.** Multivariate Cox regression analysis examining the impact of specific sleep medication on all-cause mortality.

**Table S6.** Estimation of blood pressure difference in participants with hypertension and sleep disturbance in weighted analysis.

**Table S7.** Estimated variations in blood pressure across sleep medications in participants in weighted analysis.

**Table S8.** Multivariate Cox regression analysis examining the impact of sleep medication across different treatment groups on mortality in weighted analysis.

**Table S9.** Multivariate Cox regression analysis examining the impact of specific sleep medication on mortality in weighted analysis.

**Table S1.** Types of sleep medication found in the NHANES database.

| **Check in database** | **Benzodiazepines** | | | **Benzodiazepine-like agents**  **(Z-drugs)** | **Melatoninergic drugs** | **Orexin receptor antagonists** | **Anti-**  **depressants** |
| --- | --- | --- | --- | --- | --- | --- | --- |
| **Short acting,** **mean half-life < 6 h** | **Intermediate acting,**  **mean half-life 6-24 h** | **Long acting,**  **mean half-life**  **> 24 h** |
| Find | Triazolam | Estazolam  Lorazepam  Temazepam  Oxazepam  Alprazolam | Diazepam  Flurazepam  Nitrazepam  Clonazepam | Eszopiclone  Zaleplon  Zolpidem | Melatonin  Ramelteon | Suvorexant | Doxepin |
| No Find | Brotizolam | Loprazolam  Lormetazepam  Nimetazepam  Rilmazafone | Flunitrazepam  Haloxazolam  Quazepam | Zopiclone | - | Lemborexant | - |

**Table S2.** Detail information of sleep medication.

| **Medication** | **Category** | **Check in database** | **Users**  **number** | **Mean months of medication usage** | **Detected in subsequent analysis** | **Exclusion grounds in monotherapy analysis** |
| --- | --- | --- | --- | --- | --- | --- |
| Triazolam | BDZ | Find | 7 | 20.9 | No | Limited user number (<30) |
| Alprazolam | BDZ | Find | 302 | 79.1 | Yes |  |
| Estazolam | BDZ | Find | 1 | 36 | No | Limited user number (<30) |
| Lorazepam | BDZ | Find | 145 | 70.8 | Yes |  |
| Temazepam | BDZ | Find | 81 | 59.6 | Yes |  |
| Oxazepam | BDZ | Find | 2 | 120.2 | No | Limited user number (<30) |
| Diazepam | BDZ | Find | 65 | 83.9 | Yes |  |
| Flurazepam | BDZ | Find | 1 | 0.6 | No | Limited user number (<30) |
| Nitrazepam | BDZ | Find | 1 | 204.1 | No | Limited user number (<30) |
| Clonazepam | BDZ | Find | 148 | 68.2 | Yes |  |
| Eszopiclone | Z-drugs | Find | 20 | 37.9 | No | Limited user number (<30) |
| Zaleplon | Z-drugs | Find | 6 | 85 | No | Limited user number (<30) |
| Zolpidem | Z-drugs | Find | 237 | 50.2 | Yes |  |
| Melatonin | Melatoninergic drugs | Find | 1 | 240.1 | No | Limited user number (<30) |
| Ramelteon | Melatoninergic drugs | Find | 5 | 6.6 | No | Limited user number (<30) |
| Suvorexant | Orexin receptor antagonists | Find | 1 | 2 | No | Limited user number (<30) |
| Doxepin | Antidepressants | Find | 19 | 133.2 | No | Limited user number (<30) |
| Brotizolam | BDZ | No find | - | - | No | No find |
| Loprazolam | BDZ | No find | - | - | No | No find |
| Lormetazepam | BDZ | No find | - | - | No | No find |
| Nimetazepam | BDZ | No find | - | - | No | No find |
| Rilmazafone | BDZ | No find | - | - | No | No find |
| Flunitrazepam | BDZ | No find | - | - | No | No find |
| Haloxazolam | BDZ | No find | - | - | No | No find |
| Quazepam | BDZ | No find | - | - | No | No find |
| Zopiclone | Z-drugs | No find | - | - | No | No find |
| Lemborexant | Orexin receptor antagonists | No find | - | - | No | No find |

Abbreviation: BDZ, Benzodiazepines.

**Table S3.** Characteristics of benzodiazepine users and Z-drug users.

| **Variables** | **Benzodiazepine users**  **(*n*=679)** | **Z-drug users**  **(*n*=205)** | **Statistics**  ***p*** |
| --- | --- | --- | --- |
| Age (years) | 62.0 (51.0 - 73.0) | 63.0 (53.0 - 73.0) | 0.356 |
| Gender, n (%) |  |  | 0.481 |
| Male | 267 (39.3%) | 75 (36.6%) |  |
| Female | 412 (60.7%) | 130 (63.4%) |  |
| BMI group, n (%) |  |  | 0.734 |
| Underweight (<18.5) | 8 (1.18%) | 1 (0.49%) |  |
| Normal (18.5 to <25) | 149 (21.9%) | 41 (20.0%) |  |
| Overweight (25 to <30) | 197 (29.0%) | 64 (31.2%) |  |
| Obese (30 or greater) | 325 (47.9%) | 99 (48.3%) |  |
| PIR | 1.6 (1.0 - 3.1) | 2.3 (1.2 - 4.5) | **<0.001** |
| Race, n (%) |  |  | 0.617 |
| Non-Hispanic White | 435 (64.1%) | 125 (61.0%) |  |
| Non-Hispanic Black | 91 (13.4%) | 31 (15.1%) |  |
| Mexican American | 47 (6.9%) | 19 (9.3%) |  |
| Other Hispanic | 63 (9.3%) | 15 (7.3%) |  |
| Other Race/multiracial | 43 (6.3%) | 15 (7.3%) |  |
| Education, n (%) |  |  | **0.042** |
| Less Than 9th Grade | 77 (11.3%) | 25 (12.2%) |  |
| 9-11th Grade | 103 (15.2%) | 25 (12.2%) |  |
| High School Grad/GED | 180 (26.5%) | 42 (20.5%) |  |
| Some College or AA degree | 225 (33.1%) | 68 (33.2%) |  |
| College Graduate or above | 94 (13.8%) | 45 (22.0%) |  |
| Marry status, n (%) |  |  | 0.363 |
| Marry/Living with partner | 353 (52.0%) | 114 (55.6%) |  |
| Widowed/Divorced/Separated/  Never married | 326 (48.0%) | 91 (44.4%) |  |
| Drinking status, n (%) |  |  | 0.659 |
| Yes | 504 (74.2%) | 149 (72.7%) |  |
| No | 175 (25.8%) | 56 (27.3%) |  |
| Smoking status, n (%) |  |  | **0.004** |
| Never smoker | 260 (38.3%) | 91 (44.4%) |  |
| Former smoker | 231 (34.0%) | 81 (39.5%) |  |
| Current smoker | 188 (27.7%) | 33 (16.1%) |  |
| Diabetes mellitus, n (%) |  |  | 0.979 |
| Yes | 143 (21.1%) | 43 (21.0%) |  |
| No | 536 (78.9%) | 162 (79.0%) |  |
| CVD history, n (%) |  |  | 0.140 |
| Yes | 184 (27.1%) | 45 (22.0%) |  |
| No | 495 (72.9%) | 160 (78.0%) |  |
| Depressive symptom, n (%) |  |  | 0.099 |
| Yes | 199 (29.3%) | 48 (23.4%) |  |
| No | 480 (70.7%) | 157 (76.6%) |  |

Continuous variables are expressed as Mean±Standard Deviation (SD) or Median with Interquartile Range (IQR). The categorical variables were presented as numbers and percentages. Abbreviations: BMI, body mass index; PIR, family poverty income ratio; CVD, cardiovascular disease. Bold p-values denote statistical significance at the p<.05 level.

**Table S4.** Estimated variations in blood pressure across specific sleep medications in participants with hypertension and sleep disturbance.

| **Medication** | **Medication kind** | **SBP** | | **DBP** | | **MAP** | |
| --- | --- | --- | --- | --- | --- | --- | --- |
| **Beta (95% CI)** | ***P*-value** | **Beta (95% CI)** | ***P*-value** | **Beta (95% CI)** | ***P*-value** |
| Alprazolam | BDZ | -1.74 (-3.86 ~ 0.38) | 0.108 | -0.98 (-2.32 ~ 0.35) | 0.150 | -1.24 (-2.58 ~ 0.11) | 0.072 |
| Lorazepam | BDZ | -2.34 (-5.34 ~ 0.66) | 0.127 | -1.44 (-3.33 ~ 0.44) | 0.134 | -1.74 (-3.65 ~ 0.17) | 0.073 |
| Temazepam | BDZ | -2.68 (-6.63 ~ 1.28) | 0.184 | -2.55 (-5.05 ~ -0.06) | **0.045** | -2.60 (-5.11 ~ -0.08) | **0.043** |
| Diazepam | BDZ | -5.93 (-10.34 ~ -1.51) | **0.008** | -3.58 (-6.36 ~ -0.80) | **0.011** | -4.36 (-7.17 ~ -1.56) | **0.002** |
| Clonazepam | BDZ | -4.15 (-7.01 ~ -1.20) | **0.006** | -1.67 (-3.53 ~ 0.19) | 0.078 | -2.50 (-4.37 ~ -0.63) | **0.009** |
| Zolpidem | Z-drugs | -4.62 (-6.99 ~ -2.26) | **<0.001** | -1.86 (-3.35 ~ -0.37) | **0.015** | -2.78 (-4.28 ~ -1.27) | **<0.001** |

Table illustrates the comparison between participants receiving the specific medication and those not using sleep medications. All estimated models were adjusted for age, sex, race, BMI group, poverty income ratio, education, smoking status (never, former, current), drinking status (never, former, current), marital status, CVD history (yes/no), diabetes status (yes/no) and depressive symptom (yes/no). Bold p-values denote statistical significance at the p<.05 level.

Abbreviation: SBP, systolic blood pressure; DBP, diastolic blood pressure; MAP, mean arterial pressure; BDZ, Benzodiazepines.

**Table S5.** Multivariate Cox regression analysis examining the impact of specific sleep medication on all-cause mortality.

| **Medication** | **Crude Model** | | **Model 1** | | **Model 2** | |
| --- | --- | --- | --- | --- | --- | --- |
| **HR (95% CI)** | ***P*-value** | **HR (95% CI)** | ***P*-value** | **HR (95% CI)** | ***P*-value** |
| Without sleep medication | 1[Ref.] | - | 1[Ref.] | - | 1[Ref.] | - |
| Alprazolam | 1.51 (1.17 - 1.94) | **0.002** | 1.09 (0.84 - 1.42) | 0.517 | 1.09 (0.84 - 1.41) | 0.539 |
| Lorazepam | 1.89 (1.36 - 2.61) | **<0.001** | 1.55 (1.11 - 2.15) | **0.009** | 1.45 (1.04 - 2.01) | **0.028** |
| Temazepam | 1.23 (0.74 - 2.06) | 0.423 | 0.78 (0.47 - 1.31) | 0.348 | 0.78 (0.46 - 1.31) | 0.343 |
| Diazepam | 1.47 (0.88 - 2.45) | 0.141 | 1.54 (0.92 - 2.59) | 0.102 | 1.80 (1.07 - 3.03) | **0.027** |
| Clonazepam | 1.17 (0.80 - 1.71) | 0.410 | 1.00 (0.68 - 1.46) | 0.981 | 1.01 (0.68 - 1.48) | 0.976 |
| Zolpidem | 1.53 (1.17 - 2.01) | **0.002** | 1.41 (1.07 - 1.87) | **0.014** | 1.47 (1.11 - 1.93) | **0.007** |

Abbreviation: HR, Hazard Ratio; CI, confidence interval. Cox proportional hazard models were performed for all-cause mortality. Competing risk analyses of cause-specific mortality were performed. The crude model did not adjust for any covariates. Model 1 was adjusted for age, sex, race, BMI group, poverty income ratio, education, smoking status, drinking status, marital status, and depressive symptoms (yes/no). Model 2 was adjusted for CVD history and diabetes status in addition to model 1. Bold p-values denote statistical significance at the p<.05 level.

**Table S6.** Estimation of blood pressure difference in participants with hypertension and sleep disturbance in weighted analysis.

| **Variables** | **With sleep medication**a | | **Benzodiazepine users**a | | **Z-drug users**a | |
| --- | --- | --- | --- | --- | --- | --- |
| **Beta (95% CI)** | ***P*-value** | **Beta (95% CI)** | ***P*-value** | **Beta (95% CI)** | ***P*-value** |
| **SBP** | -2.91 (-4.44 ~ -1.38) | **<0.001** | -2.36 (-4.06 ~ -0.67) | **0.007** | -2.47 (-5.57 ~ 0.63) | 0.117 |
| **DBP** | -1.43 (-2.56 ~ -0.31) | **0.013** | -1.20 (-2.49 ~ 0.08) | 0.065 | -1.32 (-3.47 ~ 0.83) | 0.225 |
| **MAP** | -1.93 (-3.01 ~ -0.84) | **0.001** | -1.59 (-2.83 ~ -0.35) | **0.013** | -1.71 (-3.78 ~ 0.37) | 0.105 |

a Compared to participants who didn't use sleeping medication.

Unstandardized coefficients are presented with 95%CI in parentheses. All estimated models were adjusted for age, sex, race, BMI group, poverty income ratio, education, smoking status (never, former, current), drinking status (never, former, current), marital status, CVD history (yes/no), diabetes status (yes/no), and depressive symptom (yes/no).

Abbreviation: SBP, systolic blood pressure; DBP, diastolic blood pressure; MAP, mean arterial pressure.

**Table S7.** Estimated variations in blood pressure across sleep medications in participants in weighted analysis.

| **Names** | **Medication kind** | **SBP** | | **DBP** | | **MAP** | |
| --- | --- | --- | --- | --- | --- | --- | --- |
| **Beta (95% CI)** | ***P*-value** | **Beta (95% CI)** | ***P*-value** | **Beta (95% CI)** | ***P*-value** |
| Alprazolam | BDZ | -2.69 (-5.22 ~ -0.17) | **0.037** | -0.49 (-2.14 ~ 1.16) | 0.557 | -1.22 (-2.94 ~ 0.49) | 0.159 |
| Lorazepam | BDZ | -2.20 (-5.67 ~ 1.26) | 0.210 | -2.10 (-4.13 ~ -0.07) | **0.043** | -2.13 (-4.12 ~ -0.15) | **0.036** |
| Temazepam | BDZ | -4.47 (-8.99 ~ 0.06) | 0.053 | -4.25 (-6.99 ~ -1.52) | **0.003** | -4.32 (-7.25 ~ -1.40) | **0.004** |
| Diazepam | BDZ | -6.09 (-13.76 ~ 1.58) | 0.118 | -4.16 (-9.21 ~ 0.89) | 0.105 | -4.80 (-10.19 ~ 0.59) | 0.080 |
| Clonazepam | BDZ | -3.05 (-5.81 ~ -0.29) | **0.030** | -0.92 (-3.29 ~ 1.46) | 0.445 | -1.63 (-3.81 ~ 0.55) | 0.141 |
| Zolpidem | Z-drugs | -4.23 (-7.37 ~ -1.09) | **0.009** | -2.47 (-4.51 ~ -0.42) | **0.019** | -3.05 (-5.12 ~ -0.99) | **0.004** |

Table illustrates the comparison between participants receiving the specific medication and those not using sleep medications. All estimated models were adjusted for age, sex, race, BMI group, poverty income ratio, education, smoking status, drinking status, marital status, CVD history, diabetes status and depressive symptom. Bold p-values denote statistical significance at the p<.05 level. Abbreviation: SBP, systolic blood pressure; DBP, diastolic blood pressure; MAP, mean arterial pressure; BDZ, benzodiazepines.

**Table S8.** Multivariate Cox regression analysis examining the impact of sleep medication across different treatment groups on mortality in weighted analysis.

| **Group** | **Crude Model** | | **Model 1** | | **Model 2** | |
| --- | --- | --- | --- | --- | --- | --- |
| **HR (95% CI)** | ***P*-value** | **HR (95% CI)** | ***P*-value** | **HR (95% CI)** | ***P*-value** |
| **All-cause mortality** | | | | | | |
| Without sleep medication | 1[Ref.] | - | 1[Ref.] | - | 1[Ref.] | - |
| With any sleep medication | 1.57 (1.29 - 1.92) | **<0.001** | 1.19 (0.97 - 1.47) | 0.099 | 1.19 (0.97 - 1.47) | 0.101 |
| Benzodiazepines | 1.51 (1.21 - 1.88) | **<0.001** | 1.08 (0.84 - 1.37) | 0.558 | 1.07 (0.84 - 1.36) | 0.599 |
| Z-drugs | 1.68 (1.14 - 2.47) | **0.008** | 1.44 (1.05 - 1.98) | **0.025** | 1.43 (1.05 - 1.96) | **0.023** |
| **Cardiovascular mortality** | | | | | | |
| Without sleep medication | 1[Ref.] | - | 1[Ref.] | - | 1[Ref.] | - |
| With any sleep medication | 0.94 (0.52 - 1.69) | 0.827 | 0.74 (0.41 - 1.33) | 0.312 | 0.73 (0.41 - 1.32) | 0.295 |
| Benzodiazepines | 0.89 (0.50 - 1.59) | 0.698 | 0.64 (0.38 - 1.08) | 0.096 | 0.61 (0.36 - 1.04) | 0.068 |
| Z-drugs | 0.51 (0.18 - 1.43) | 0.203 | 0.46 (0.18 - 1.18) | 0.105 | 0.46 (0.18 - 1.17) | 0.104 |

Abbreviation: HR, Hazard Ratio; CI, confidence interval. Cox proportional hazard models were performed for all-cause mortality. Competing risk analyses of cause-specific mortality were performed. The crude model did not adjust for any covariates. Model 1 was adjusted for age, sex, race, BMI group, poverty income ratio, education, smoking status, drinking status, marital status, and depressive symptoms (yes/no). Model 2 was adjusted for CVD history and diabetes status in addition to model 1. Bold p-values denote statistical significance at the p<.05 level.

**Table S9.** Multivariate Cox regression analysis examining the impact of specific sleep medication on mortality in weighted analysis.

| **Group** | **Crude Model** | | **Model 1** | | **Model 2** | |
| --- | --- | --- | --- | --- | --- | --- |
| **HR (95% CI)** | ***P*-value** | **HR (95% CI)** | ***P*-value** | **HR (95% CI)** | ***P*-value** |
| **All-cause mortality** | | | | | | |
| Without sleep medication | 1[Ref.] | - | 1[Ref.] | - | 1[Ref.] | - |
| Alprazolam | 1.46 (1.12 - 1.91) | **0.006** | 0.96 (0.68 - 1.36) | 0.822 | 0.94 (0.66 - 1.35) | 0.749 |
| Lorazepam | 1.73 (1.04 - 2.86) | **0.034** | 1.44 (0.94 - 2.23) | 0.097 | 1.41 (0.91 - 2.18) | 0.129 |
| Temazepam | 1.37 (0.69 - 2.69) | 0.365 | 0.78 (0.39 - 1.57) | 0.484 | 0.78 (0.37 - 1.65) | 0.519 |
| Diazepam | 2.09 (1.03 - 4.25) | **0.042** | 1.91 (0.96 - 3.78) | 0.063 | 2.21 (1.12 - 4.33) | **0.021** |
| Clonazepam | 1.50 (0.98 - 2.28) | 0.060 | 1.29 (0.77 - 2.15) | 0.330 | 1.34 (0.83 - 2.18) | 0.229 |
| Zolpidem | 1.63 (1.13 - 2.34) | **0.008** | 1.41 (1.02 - 1.94) | **0.036** | 1.46 (1.06 - 2.02) | **0.022** |
| **Cardiovascular mortality** | | | | | | |
| Without sleep medication | 1[Ref.] | - | 1[Ref.] | - | 1[Ref.] | - |
| Alprazolam | 0.99 (0.41 - 2.38) | 0.980 | 0.65 (0.29 - 1.45) | 0.294 | 0.62 (0.29 - 1.35) | 0.231 |
| Lorazepam | 0.64 (0.21 - 1.91) | 0.422 | 0.53 (0.19 - 1.53) | 0.242 | 0.50 (0.18 - 1.41) | 0.192 |
| Temazepam | - | - | - | - | - | - |
| Diazepam | 2.57 (0.88 - 7.51) | 0.083 | 2.62 (0.93 - 7.36) | 0.069 | 3.27 (1.31 - 8.16) | **0.011** |
| Clonazepam | 1.49 (0.35 - 6.41) | 0.594 | 1.37 (0.29 - 6.44) | 0.693 | 1.41 (0.31 - 6.46) | 0.656 |
| Zolpidem | 1.24 (0.43 - 3.59) | 0.697 | 1.15 (0.40 - 3.28) | 0.795 | 1.23 (0.43 - 3.52) | 0.699 |
| Z-drugs | 0.99 (0.41 - 2.38) | 0.98 | 0.65 (0.29 - 1.45) | 0.294 | 0.62 (0.29 - 1.35) | 0.231 |

Abbreviation: HR, Hazard Ratio; CI, confidence interval. Cox proportional hazard models were performed for all-cause mortality. Competing risk analyses of cause-specific mortality were performed. The crude model did not adjust for any covariates. Model 1 was adjusted for age, sex, race, BMI group, poverty income ratio, education, smoking status, drinking status, marital status, and depressive symptoms (yes/no). Model 2 was adjusted for CVD history and diabetes status in addition to model 1. Bold p-values denote statistical significance at the p<.05 level.
